# Supplementary material for: Tamoxifen represses alcohol-induced transcription of RNA polymerase III-dependent genes in breast cancer cells
Source: PubMed Central journal article supplement (PMC4322994; doi:10.18632/oncotarget.2678), 2014-11-04
Supplement: oncotarget-05-12410-s001.pdf [file oncotarget-05-12410-s001.pdf]

# Tamoxifen represses alcohol-induced transcription of RNA polymerase III-dependent genes in breast cancer cells

## Supplementary Material

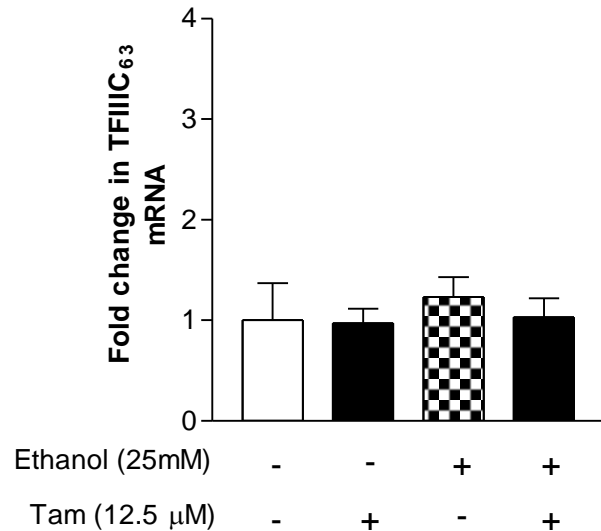

**S. 1:** Tam does not affect TFIIIC63 gene transcription. ER+ MCF-7 cells were starved in DMEM/12 for 3 h, pretreated with 12.5 μM Tam for 1 h, and then treated with 25 mM ethanol for another 1 h as indicated in **Fig. 1**. RNA was isolated from these cells and RT-qPCR was performed to measure the amounts TFIIIC<sub>63</sub> transcription. The fold change was calculated by normalizing to the amount of GAPDH mRNA. The bars represent Mean  $\pm$  SE of at least three independent determinations.

**Table S1: Primer Sets for Quantitative RT-PCR**

| Target                         | Primers                                                                                          | Annealing Temperature |
|--------------------------------|--------------------------------------------------------------------------------------------------|-----------------------|
| Pre-tRNA <sup>Leu</sup><br>(1) | (F) 5'-GTC AGG ATG GCC GAG TGG TCT AAG-3'<br>(R) 5'-CCA CGC CTC CAT ACG GAG AAC CAG AAG ACC C-3' | 61°                   |
| 5S rRNA (2)                    | (F) 5' GGC CAT ACC ACC CTG AAC GC 3'<br>(R) 5' CAG CAC CCG GTA TTC CCA GG 3'                     | 61°                   |
| Human Bf1<br>(3)               | (F) 5' CCT CGG GCC TCT GCG GAG CAG -3'<br>(R) 5' TCA TCA ATG GTC AAC TGA CTG GTG G -3'           | 60°                   |

|           |                                                                              |     |
|-----------|------------------------------------------------------------------------------|-----|
| GAPDH (2) | (F) 5'-TCC ACC ACC CTG TTG CTG TA-3'<br>(R) 5'-ACC ACA GTC CAT GCC ATC AC-3' | 61° |
|-----------|------------------------------------------------------------------------------|-----|

Abbreviations: (F) = forward, (R) = reverse.

| <b>Table S2: Primer Sets for ChIP</b> |                                                                                                     |                              |
|---------------------------------------|-----------------------------------------------------------------------------------------------------|------------------------------|
| <b>Target</b>                         | <b>Primers</b>                                                                                      | <b>Annealing Temperature</b> |
| hBrf1 promoter<br>-233/+42 (3)        | (F) 5' CGT CCA GCT TTA GTC CCC GAC 3'<br>(R) 5' CGA GCC CAA GGC GGC TTC G 3'                        | 63°                          |
| hBrf1 promoter<br>-1153/-941          | (F) 5' GAG ACA GAG TTT CAC TAT TGT C 3'<br>(R) 5' GGT ACA ACC GGT CCG ACC AGA GC 3'                 | 62°                          |
| tRNA <sup>Leu</sup> gene<br>(1)       | (F) 5'-GTC AGG ATG GCC GAG TGG TCT AAG-3'<br>(R) 5'-CCA CGC CTC CAT ACG GAG AAC CAG AAG<br>ACC C-3' | 61°                          |
| 5S rRNA (2)                           | (F) 5' GGC CAT ACC ACC CTG AAC GC 3'<br>(R) 5' CAG CAC CCG GTA TTC CCA GG 3'                        | 61°                          |

### Supplemental references

1. Crighton D, Woiwode A, Zhang C, Mandavia N, Morton JP, Warnock LJ, *et al.*, p53 represses RNA polymerase III transcription by targeting TBP and inhibiting promoter occupancy by TFIIIB. *EMBO J.* 2003; 22: 2810–2820.
2. Winter AG, Sourvinos G, Allison SJ, Tosh K, Scott PH, Spandidos DA, *et al.* RNA polymerase III transcription factor TFIIIC2 is overexpressed in ovarian tumors. *Proc Natl Acad Sci U S A.* 2000; 97: 12619-12624.
3. Zhang Q, Jin J, Zhong Q, Yu XL, Levy D, Zhong S. ER $\alpha$  mediates alcohol-induced deregulation of Pol III genes in breast cancer cells. *Carcinogenesis* 2013; 34: 28-37.
